# Development and validation of a dynamic prediction model for unplanned ICU admission and mortality in hospitalized patients

Davide Placido<sup>1</sup> — Hans-Christian Thorsen-Meyer<sup>1,2</sup> – Benjamin Skov Kaas-Hansen<sup>2,3</sup>  
— Roc Reguant<sup>1,4</sup> - Søren Brunak<sup>1</sup>

## Affiliations

<sup>1</sup> Novo Nordisk Foundation Center for Protein Research, University of Copenhagen, Denmark

<sup>2</sup> Department of Intensive Care Medicine, Copenhagen University Hospital (Rigshospitalet), Copenhagen, Denmark

<sup>3</sup> Section for Biostatistics, Department of Public Health, University of Copenhagen, Denmark

<sup>4</sup> Australian e-Health Research Centre, Commonwealth Scientific and Industrial Research Organisation, New South Wales, Sydney, Australia

\* Corresponding author. Address: Novo Nordisk Foundation Center for Protein Research, University of Copenhagen, Blegdamsvej 3B, 2200 Copenhagen N, Denmark.

## ORCID id's

DP: 0000-0002-8327-8838

BSKH: 0000-0003-1023-0371

RR: 0000-0002-0350-3899

HCTM: 0000-0001-7002-3089

SB: 0000-0003-0316-5866

## 27 Abstract

28 Frequent assessment of the severity of illness for hospitalized patients is essential in  
29 clinical settings to prevent outcomes such as in-hospital mortality and unplanned ICU  
30 admission. Classical severity scores have been developed typically using relatively few  
31 patient features, especially for intensive care. Recently, deep learning-based models  
32 demonstrated better individualized risk assessments compared to classic risk scores  
33 such as SOFA and NEWS, thanks to the use of aggregated and more heterogeneous  
34 data sources for dynamic risk prediction. We investigated to what extent deep learning  
35 methods can capture patterns of longitudinal change in health status using time-  
36 stamped data from electronic health records. We used medical history data,  
37 biochemical measurements, and the clinical notes from all patients admitted to non-  
38 intensive care units in 12 hospitals in Denmark's Capital Region and Region Zealand  
39 during 2011-2016. Data from a total of 852,620 patients and 2,241,849 admissions were  
40 used to predict the composite outcome of unplanned ICU transfer and in-hospital  
41 death at different time points after admission to general departments. We subsequently  
42 examined feature interpretations of the models. The best model used all data  
43 modalities with an assessment rate of 6 hours and a prediction window of 14 days,  
44 with an AUPRC of 0.287 and AUROC of 0.898. These performances are comparable to  
45 the current state of the art and make the model suitable for further prospective  
46 validation as a risk assessment tool in a clinical setting.

47

## 48 Introduction

49 Early warning scores (EWS) are used in the clinic to assess the health status of  
50 hospitalized patients. The first EWS were based solely on five physiological parameters  
51 followed by many adaptations and improvements (1), (2). VitalPAC was one such early  
52 warning score (ViEWS), which introduced modifications to the parameters  
53 contributing to the score (3). These modifications were based on clinicians' knowledge  
54 about the relationship between physiological data and adverse clinical outcomes.  
55 Further modifications were implemented in the national early warning score, NEWS  
56 (4).

57 These scores are used extensively because their simplicity makes them applicable and  
58 easily comparable across different departments and countries. They specifically  
59 provide estimates for the risk of adverse outcomes (5) such as cardiac arrest, ICU  
60 transfer, and in-hospital mortality. However, they suffer from some limitations. The  
61 relatively few data types used limit their predictive power. Relevant features like  
62 biochemical measurements, the order of temporality in the data, or non-linear feature  
63 interactions are ignored. These risk calculations are made without exploiting all the  
64 information that current EHR systems provide (6). Moreover, the scores mostly rely on  
65 data that are manually collected by the staff. This often entails a higher number of  
66 missing and incorrect data items, as compared to a fully automated approach. Recently  
67 it was shown in population-wide data from inpatients of the Capital Region of  
68 Denmark, that around 10% of the NEWS records were incomplete and 0.2% had  
69 implausible features (7).

70 To improve prediction accuracy and reduce alarm fatigue, new applications using  
71 more data and more sophisticated methodologies have been developed (8). Given the  
72 heterogeneous nature of EHR data and the rarity of events such as clinical  
73 deterioration, machine learning methods seem well-suited for addressing this task.  
74 Deep learning, in particular, has performed well for many similar clinical tasks. For  
75 example, Shamout et al. (9) developed a deep learning model that uses vital signs to  
76 predict the composite outcome of ICU transfer, cardiac arrest and mortality. Cho et al.  
77 (10) developed a deep learning model to predict the composite outcome of cardiac  
78 arrest and ICU transfer, while da Silva et al. (11) developed a long-short term memory  
79 neural network (LSTM) to predict the worsening of the vital signs using prognostic  
80 indexes. A recurrent deep neural network has also been used by Tóth et al. (12) to  
81 predict stability of vital signs to avoid unnecessary measurements at nighttime.  
82 Similarly, dynamic deep learning models using multiple data sources have been  
83 developed for different tasks; Thorsen-Meyer et al. (13) constructed one to predict 90-  
84 days mortality after ICU admission, Rajkomar et al. (14) to predict in-hospital death,  
85 30-day unplanned readmission, prolonged length of stay and patient's final discharge

86 diagnoses; Tomašev et al. (15) to predict kidney failure; Lauritsen et al. to predict risk  
87 of sepsis and acute critical illness (16) (17).

88 Although deviating vital signs often precipitate clinical deterioration, their recognition  
89 in the general ward requires continuous engagement by health care personnel, which  
90 can delay or even preclude their recording. Therefore, we investigated using data  
91 collected less frequently in early detection of deterioration, building an end-to-end  
92 machine learning pipeline that integrates heterogeneous clinical data to predict the risk  
93 of imminent serious clinical deterioration at regular intervals.

94 To this end, we combined natural language processing algorithms and recurrent neural  
95 networks to leverage latent patterns in the data. We subsequently assessed the impact  
96 of the single data sources and the so-called tokens extracted from each of them to  
97 improve the understanding of the model.

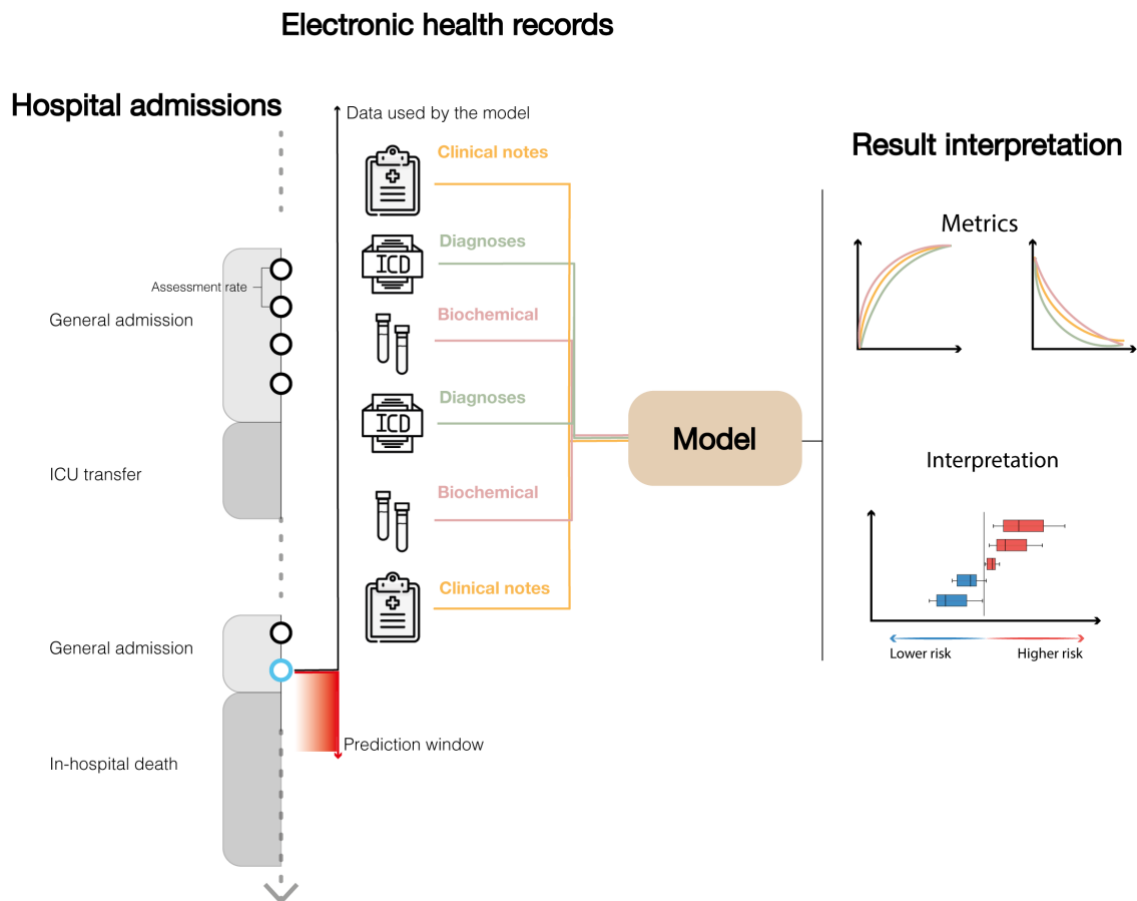

98

99

100

101

102

**Figure1: General structure of the prediction framework.** Given a specific assessment rate (time between two consecutive risk assessments) and prediction window (time window within which the outcome is observed), the risk of clinical deterioration was assessed continuously during each general

103 admission. All the data up to the time of assessment was used to train the  
104 model, which was then evaluated and interpreted on the holdout test data.

## 105 Methods

106 This paper adheres to relevant items in the Transparent Reporting of a multivariable  
107 prediction model for Individual Prognosis or Diagnosis statement (TRIPOD) (18).

### 108 Patients and outcome

109 The data comprise all inpatient admissions, from 2011 to 2016, to 12 public hospitals in  
110 the Capital Region of Denmark and Region Zealand. The admissions were pieced  
111 together by concatenating consecutive inpatient visits 24 hours apart so that the  
112 department transfers were not considered two separate events.

113 Direct ICU admissions, outpatients and emergency admissions were excluded, as were  
114 individuals with disconnected medical record history (either because these patients  
115 moved to another country or lacked a stable residence) and minors (age <16 years).

116 The outcome *clinical deterioration* was defined as unplanned ICU transfer or in-hospital  
117 mortality within the so-called prediction window. Unplanned ICU transfer was  
118 defined as any acute admission to an ICU (filtering by the codes NABE and NABB  
119 from the Sundhedsvæsenets Klassifikations System (SKS) - the Danish Health Service  
120 Classification System) within 24 hours after discharge from a non-ICU ward.

### 121 Model

122 The model architecture (Figure2) was designed as a scalable network that can be  
123 adapted to different data modalities by using one sub-model per data domain; each  
124 sub-model consists of an embedding layer (which transforms the categorical variables  
125 into vectors), a recurrent neural network (which learns from the sequence of  
126 embedding vectors) and a pooling layer (which reduces the vectors' dimensionality).

127 The network uses tokens, i.e. sequences of characters grouped together based on their  
128 semantics, as input. We chose the entity embedding approach to exploit the  
129 heterogeneity and sparseness of the input data, thus mapping the tokens constructed  
130 from the categorical features to embeddings in a Euclidean space (i.e. the embedding  
131 space) (19). For each sub-model, the vocabulary size  $V$  (i.e. the number of unique  
132 tokens for the specific data source) was directly used to calculate the size of the  
133 embedding representation according to  $EmbeddingSize = 6 \cdot \alpha \cdot \sqrt[4]{V}$ , where the  
134 embedding coefficient  $\alpha$  was estimated by hyperparameter search (14).

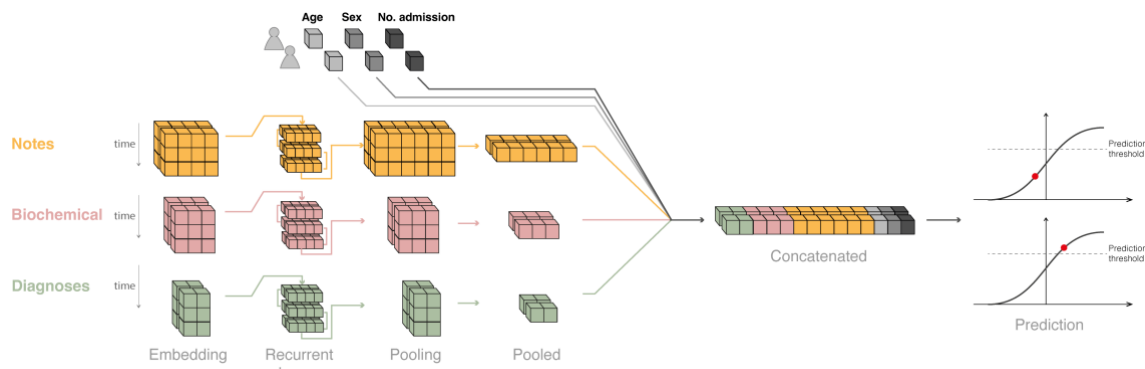

135

136

137

138

139

140

141

142

**Figure2: Structure of the deep learning model, exemplified by two admissions.**

For each sample (i.e. admission at a specific time point) a 2D tensor (matrix) comprises the sequence of embedded tokens until the time of assessment. Each tensor was given as input to a recurrent block (GRU or LSTM, part of the hyperparameters search) and the time dimension was pooled through an attention pooling layer. The flattened tensors were then concatenated and fed to a linear layer with a standard logistic activation function.

143

We explored two types of recurrent neural networks, Gated Recurrent Unit (GRU) (20) and Long Short-Term Memory (LSTM) networks (21). Rather than max or average pooling – which retains neither positional nor intensity information – we used an attention-based pooling (22) which employs a weighted mechanism to retain the most relevant parts of a sequence. The attention-based pooling layer was used to aggregate the temporal dimension of the recurrent layer output, which was then concatenated across the different data sources. The final layer was a linear (= dense) layer with a standard logistic activation function hence mapping the output into the interval [0, 1] to yield valid predicted probabilities. The features without temporal components (age, number of previous hospital admissions and sex) were fed into the model by concatenating them to the output of the pooling layer.

154

## Data sources and processing

155

The input data comprised medical disease history, biochemical measurements, clinical notes and demographics (age, sex and number of previous admissions). The medical disease history prior to the start of the EHR data was also used (as well as after to handle false negative outcomes not covered after the EHR data period). A schematic of the time spans for the different data modalities is depicted in FigureS1. The disease history was extracted from the Danish National Patient Registry (DNPR) for the period between 1977 and 2018 (23). DNPR is nation-wide registry which covers essentially all the hospital encounters in Denmark. The disease codes use Danish adaptations from SKS of the International Classification of Diseases (ICD) version 8 up to 1993, and ICD-

163

164 10 from 1994 and onwards. Only diagnosis codes recorded prior to the admission date  
 165 were included in the predictive schemes.

166 Biochemical values were extracted from the Clinical Laboratory Information System  
 167 (LABKA) and the Clinical Chemistry Laboratory System (BCC) databases (24) for the  
 168 period overlapping the hospital admissions (2011-2016). These databases collect all the  
 169 biochemical tests performed by the Danish hospital laboratories in the Capital Region  
 170 and Region Zealand, respectively. The biochemistry tokens were constructed using the  
 171 name of the biochemical component, the specimen (blood, plasma etc.), the unit and  
 172 the quantile of the value of the measurement (to yield a vocabulary with a reasonable  
 173 size); for example, [HEMOGLOBIN B mmol/L@8-8.5](#). The quantile binning was included  
 174 as a hyperparameter.

175 The clinical notes were extracted from the EHR data for the admissions from 2011 to  
 176 2016. The free text required some preprocessing before tokenization, such as removing  
 177 punctuation, names, stop words (25), negations and signatures of the clinicians. Due to  
 178 the large number of terms coming from the medical notes, the embedding of this  
 179 specific data source was trained separately on the full corpus using fastText (26), to  
 180 reduce the number of parameters to update during training.

181

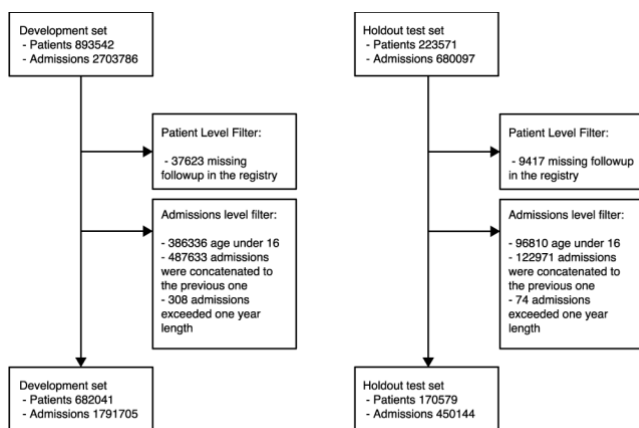

182

183 **Attrition diagram: Study profile.**

184

185 **Table 1.** Summary statistics for the Development and Test sets. Statistics are calculated at the  
 186 admission level.

|                    | Development Set | Test Set |
|--------------------|-----------------|----------|
| Number of Patients | 682041          | 170579   |

|                                        |                 |                |
|----------------------------------------|-----------------|----------------|
| Number of Admissions                   | 1791705         | 450144         |
| Age at prediction                      |                 |                |
| - Discharge                            | 60 [40-73]      | 60 [40-73]     |
| - ICU Transfer                         | 67 [56-75]      | 67 [56-75]     |
| - In-hospital Death                    | 78 [68-86]      | 78 [69-86]     |
| Sex:                                   |                 |                |
| - Male                                 | 798185 (45%)    | 199732 (44%)   |
| - Female                               | 993520 (55%)    | 250412 (56%)   |
| Outcome                                |                 |                |
| - Discharge                            | 1752329 (97.8%) | 440221 (97.8%) |
| - ICU Transfer                         | 13129 (0.7%)    | 3305 (0.7%)    |
| - In-hospital Death                    | 26247 (1.5%)    | 6618 (1.5%)    |
| Number of previous Admissions          |                 |                |
| - Discharge                            | 1 [0-4]         | 1 [0-4]        |
| - ICU Transfer                         | 2 [0-6]         | 2 [0-6]        |
| - In-hospital Death                    | 3 [1-7]         | 3 [1-6]        |
| Length of stay before outcome (Hours): |                 |                |
| - Discharge                            | 31 [9-98]       | 31 [9-97]      |
| - ICU Transfer                         | 35 [8-121]      | 35 [8-132]     |
| - In-hospital Death                    | 126 [43-285]    | 122 [43-279]   |
| Type ICU Transfer                      |                 |                |
| - Surgical                             | 2358 (0.18%)    | 639 (0.20%)    |
| - Medical                              | 10771 (0.82%)   | 2666 (0.80%)   |

187

## 188 Training and Evaluation

189 We randomly split the dataset into a development set (80%) for model creation and an  
 190 independent holdout test set (20%) for model evaluation. The split of the dataset was  
 191 done at the patient level and assigned admissions of the same patient to the same set to  
 192 avoid leaking information between the sets (27). The development set was further split  
 193 into a training set (80%, 64% of total) and validation set (20%, 16% of total) to counter  
 194 overfitting and to calibrate the model before testing it on the holdout set.

195 Three submodels were trained separately to find the best submodel-specific  
 196 hyperparameters; we used Optuna's multivariate TPEsampler, based on the Three-  
 197 structured Parzen Estimator (TPE) algorithm to search the hyperparameter spaces  
 198 (28,29). While searching the hyperparameter space, we fixed the prediction window at  
 199 24 hours and the assessment rate at 12 hours, to facilitate the comparison across the



200 different data types. TableS1 shows the hyperparameters explored for each submodel;  
201 FiguresS2-S4 illustrate the hyperparameter searches. For each experiment, the loss on  
202 the validation set was used as training metric to select the model at the best epoch. The  
203 performance metric used to select the best model for each search was the area under  
204 the precision-recall curve (AUPRC). Although the area under the receiver operating  
205 curve (AUROC) score is a more common metric for classification tasks, in this case it  
206 would not be sufficient to appreciate the real ability of the model to discriminate  
207 between the two classes due to their considerable imbalance (30). AUPRC on the other  
208 hand is much more robust to class imbalances. We used 200 bootstraps samples (31) to  
209 construct the 95% confidence interval for the metrics shown in figures and tables.

210 Using the best submodel architectures, we trained and evaluated an ensemble model  
211 for different prediction windows (1, 2, 7, 14 days) and assessment rates (every 6, 12 and  
212 24 hours). Finally, we applied post-hoc isotonic calibration to align the final predicted  
213 risk with the actual outcome incidence, using the data in the validation set (32). The  
214 model re-calibration was achieved by fitting an isotonic regression using the output of  
215 the model prior to calibration as regressor and the actual label of the samples as  
216 response variable. We used the validation set to fit the isotonic regression and kept the  
217 test set untouched. The fitted isotonic model was used to adjust the output of the  
218 uncalibrated model to get calibrated predictions.

219 All the results reported are generated using the re-calibrated model on the test set. To  
220 control for biases driven by age or sex, performances were also evaluated at each time  
221 of assessment for the different subgroups.

## 222 Interpretation

223 The impact of the different tokens on the model outcome was calculated using the  
224 GradientShap algorithm (33) from the *Captum* library (34). Given an input feature of a  
225 single risk assessment, its Shap value is correlated to how much (and in what direction)  
226 that feature pulls the individual-level prediction away from the population-level mean  
227 risk. Importantly, Shap values do not represent the effect of a single feature on the  
228 model outcome but rather the effect of that feature in the context of a coalition of  
229 features. Shap values were calculated for the best model after isotonic re-calibration.

## 230 Results

231 The model was trained on 682,041 unique patients and 1,791,705 admissions and  
232 evaluated on 170,579 patients and 450,144 admissions as described in Methods. In both  
233 parts, 1.5% of the admissions resulted in in-hospital mortality and 0.7% in ICU transfer.  
234 2,583 tokens from the ICD code data type (medical history), 2,421 tokens from the  
235 biochemical measurements and 403,869 tokens from the medical notes were used as

236 input. We investigated the inclusion of each data type separately as well as jointly in  
237 the same model.

238 When we explored how the prediction window and assessment rate affect the  
239 performances, the most performant model was the one trained on all the data sources  
240 using a prediction window of 14 days and an assessment rate of 6 hours with an  
241 AUROC of 0.904 [0.903-0.905] and AUPRC 0.285 [0.283-0.287] over all the predictions  
242 (Table2). This model was after isotonic recalibration well-calibrated (FigureS5) with a  
243 calibration slope of 0.964 [0.951, 0.98], an intercept of 0.002 [0.001-0.003] and an upper  
244 bound risk of 79%.

245 The performances were similar across sexes, with AUPRCs of 0.288 [0.285-0.290] and  
246 0.280 [0.277-0.283] for males and females, respectively. The performances for the  
247 different age groups varied more, with a trend of AUPRC increasing with age (age 16-  
248 37: 0.168 [0.157-0.180], age 37-58: 0.252 [0.246-0.257], age 58-79: 0.277 [0.274-0.280], age  
249 79-100: 0.310 [0.307-0.313]).

250 We observed an increased AUPRC for risk estimates further into the hospital stay with  
251 a peak at 7 days into the admission FigureS6-S7.

252

253 **Table2. Performance on the test set for models using all data types.**

| Frequency of assessment | Prediction window | AUROC               | AUPRC               | Calibration         |                     |
|-------------------------|-------------------|---------------------|---------------------|---------------------|---------------------|
|                         |                   |                     |                     | Slope               | Intercept           |
| 6h                      | 1d                | 0.925 [0.923-0.926] | 0.152 [0.149-0.155] | 1.042 [1.02-1.064]  | -0.001 [-0.001-0.0] |
|                         | 2d                | 0.922 [0.921-0.923] | 0.180 [0.177-0.184] | 0.988 [0.966-1.007] | 0.002 [0.001-0.003] |
|                         | 7d                | 0.913 [0.912-0.914] | 0.269 [0.267-0.271] | 0.996 [0.985-1.008] | 0.002 [0.001-0.003] |
|                         | 14d               | 0.904 [0.903-0.904] | 0.285 [0.283-0.286] | 0.964 [0.951-0.98]  | 0.004 [0.003-0.005] |
| 12h                     | 1d                | 0.918 [0.916-0.920] | 0.129 [0.125-0.134] | 0.998 [0.96-1.045]  | 0.001 [0.0-0.002]   |
|                         | 2d                | 0.916 [0.914-0.917] | 0.187 [0.183-0.191] | 0.996 [0.977-1.021] | 0.002 [0.0-0.003]   |
|                         | 7d                | 0.898 [0.897-0.899] | 0.233 [0.231-0.236] | 1.045 [1.026-1.067] | -0.001 [-0.002-0.0] |

|     |     |                     |                     |                     |                      |
|-----|-----|---------------------|---------------------|---------------------|----------------------|
|     | 14d | 0.901 [0.900-0.902] | 0.278 [0.275-0.282] | 0.952 [0.912-0.997] | 0.005 [0.001-0.007]  |
| 24h | 1d  | 0.905 [0.901-0.908] | 0.135 [0.130-0.140] | 1.038 [0.992-1.078] | 0.0 [-0.001-0.001]   |
|     | 2d  | 0.901 [0.899-0.903] | 0.163 [0.157-0.169] | 1.017 [0.969-1.059] | 0.0 [-0.001-0.002]   |
|     | 7d  | 0.896 [0.894-0.897] | 0.232 [0.227-0.236] | 1.014 [0.969-1.05]  | 0.001 [-0.001-0.003] |
|     | 14d | 0.893 [0.892-0.894] | 0.250 [0.246-0.254] | 0.974 [0.951-1.006] | 0.003 [0.001-0.005]  |

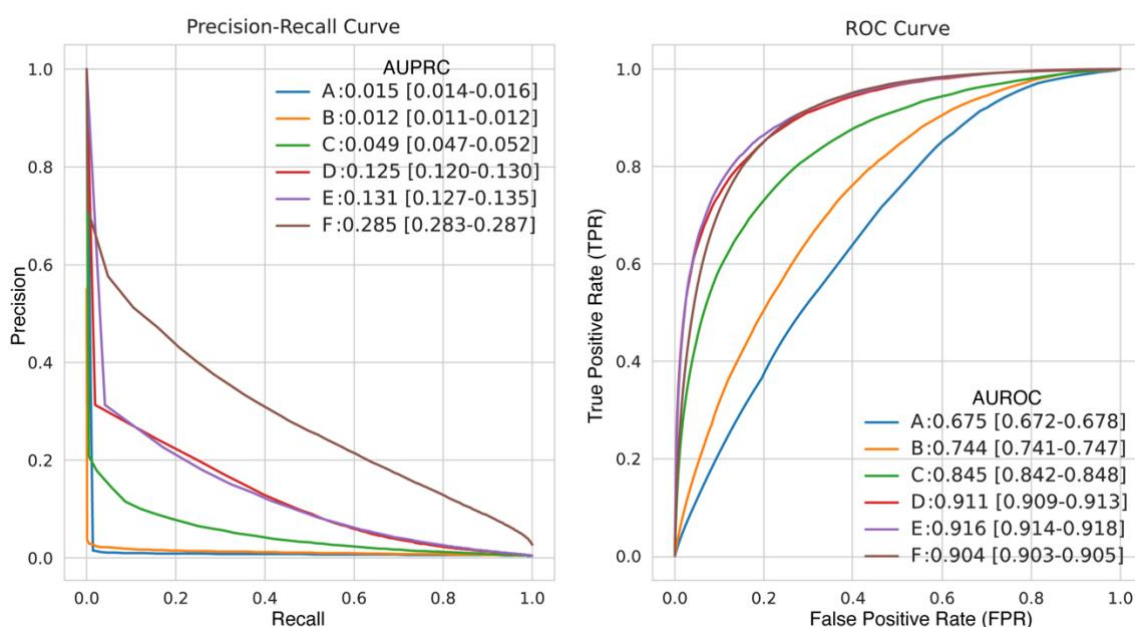

254

255

256

257

258

259

260

261

262

263

264

265

266

267

**Figure 3. Performance of the model for prediction of unplanned ICU transfer or in-hospital death.** Panel A: precision recall curves for the six models. Panel B: receiver operating characteristic (ROC) curves show the values of true positive rate (= recall = sensitivity) and false positive rate (= 1-specificity) at different thresholds for the six models. Model A: age, sex, number of admissions. Model B: model A + medical history data. Model C: model A + biochemical data. Model D: model A + clinical notes. Models E and F: model A + medical history data, biochemical data and clinical notes. Models A–E use a 24-hour prediction window and a 12-hour assessment rate. Model F uses a 14-day prediction window and a 6-hour assessment rate.

Among the models trained separately using a 24-hour prediction window and 12 hours assessment rate, the most performant was the one trained on the clinical notes with an

268 AUPRC of 0.125 [0.120-0.130]; this value improved to AUPRC of 0.131 [0.127-0.135]  
269 when the model was trained on all the data using the same prediction window and  
270 assessment rate.

271 The best encoding of disease diagnoses was rolling diagnoses up to the third ICD level  
272 (e.g. C341M to C34) and a padding size of 9 (FigureS2). The optimal quantile resolution  
273 for the biochemical data was deciles (i.e. 10 bins) and a padding size of 28 was the  
274 optimal number of lab values to include before time of prediction (FigureS3). The  
275 optimal padding size for medical notes was 299, reflecting the larger amount of  
276 information usually held by the clinical notes (FigureS4). The complete list of the  
277 optimal parameters for each search can be found in the supplementary TableS1.

## 278 Feature importance

279 The importance of the tokens from the different vocabularies can be sorted according  
280 to their attributed Shap values (Figure4). Higher age and male sex were associated  
281 with elevated risk of deterioration. The opposite was the case for the number of  
282 previous admissions: a higher number of previous admissions was associated with  
283 lower risk of deterioration (Figure4.A-C).

284 The diagnosis tokens associated with clinical deterioration were often those of acute  
285 illnesses such as respiratory failure, neoplasm and pneumonia (Figure4.D). In contrast,  
286 diagnosis codes related to pregnancy, chronic conditions and orthopedics were  
287 associated with lower risk.

288 Low levels of albumin, lymphocytes and sodium were associated with elevated risk of  
289 clinical deterioration; the same were high levels of C-reactive protein, leukocytes,  
290 sodium, lactate dehydrogenase, potassium and carbamide (Figure4.E). In contrast,  
291 normal levels of leucocytes, hemoglobin, C-reactive protein, sodium and potassium  
292 were all associated with low risk of deterioration.

293 The tokens from clinical notes most strongly associated with clinical deterioration were  
294 *severely, intensive, respiratory and chronic. Pain, leukocytes, control, normal, home,*  
295 *discharge(d)* and on the other hand, were all associated with low risk (Figure4.F).

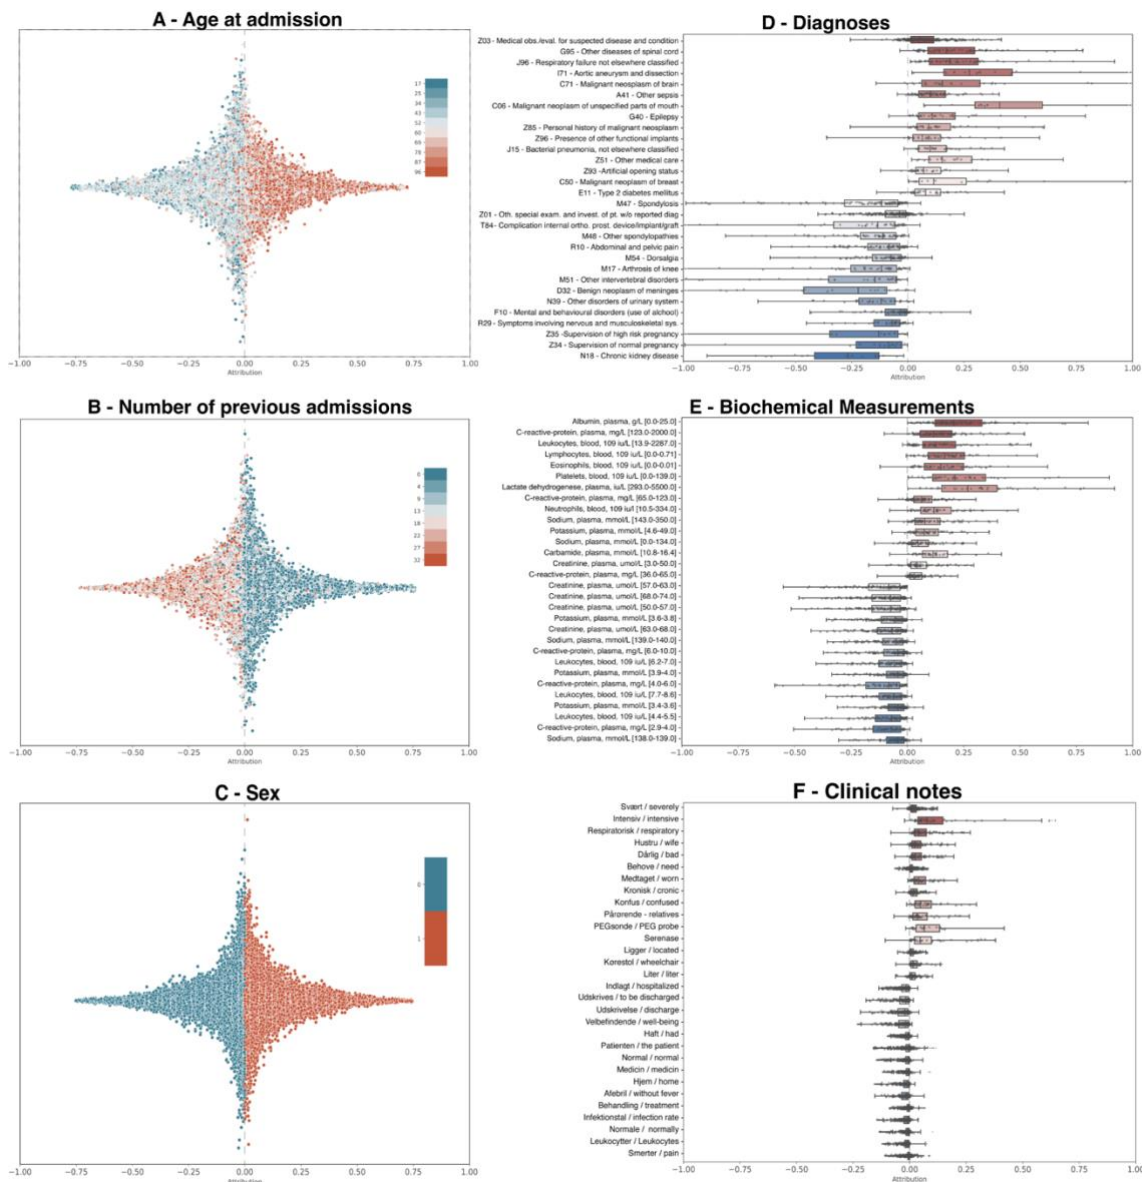

296

297

298

299

300

301

302

303

304

305

306

**Figure4: Contribution of the different tokens to the outcome of clinical deterioration.** Shap values were estimated using the best model (model using age, sex, number of admissions, medical history data, biochemical data and clinical notes with a 14-day prediction window and 6-hours assessment rate). Panels A-C: the distribution of Shap values for each feature without temporal components, with the color scale representing the feature value. Panels D-F: the distribution of Shap values for top-15 tokens (in up- and downward directions, respectively). Overlain boxes-and-whiskers show medians, quartiles and 1.5 x quartiles.

## 307 Discussion

308 The main aim of this study was to explore whether data types registered routinely in  
309 general departments are predictive of clinical deterioration, ultimately to assess if these  
310 suffice for this task. A solution based on data collected routinely might circumvent a  
311 common weakness of EWS, i.e. they depend on data that require clinical engagement  
312 (e.g., vital signs). Consequently, offering a viable alternative for risk stratification with  
313 minimum additional manual data collection effort is preferable.

314 Exploiting the combined power of entity embedding of tokens from electronic health  
315 records and the ability of recurrent neural networks to learn temporal patterns from  
316 such data, we built a performant (AUROC and AUPRC up to 0.90 and 0.28,  
317 respectively) and well-calibrated deep learning model for predicting the risk of clinical  
318 deterioration. Specifically, leveraging medical history data (up to 40 years) from a  
319 national register along with in-hospital biochemical data and clinical notes, we trained  
320 the model dynamically, meaning that the same model can handle different time points  
321 for the same admission.

322 Direct comparison of our model to the performances of h is not possible, since the vital  
323 signs used for the calculation of such scores are not collected in our EHR dataset.  
324 Comparison of the performance of our model to other work is also non-trivial: AUROC  
325 is the most common metric for risk stratification and usually the one used to compare  
326 performance across studies. Nevertheless, it is unsuited for imbalanced prediction  
327 problems (such as the one defined here) because it disregards the prevalence of the  
328 outcome of interest (30). Although AUPRC does account for prevalence, it is not  
329 always reported in the classic studies on EWS scores. Moreover, direct comparison of  
330 the AUPRCs requires equal (or at least similar) prevalence of the outcome across  
331 studies; this is problematic because the prevalence tends to vary between cohorts, and,  
332 more importantly, so do the criteria used to define it. For example, Watkinson et al.  
333 (35) defined the outcome as the composite of ICU transfer, in-hospital death and  
334 cardiac arrest with a prediction window of 24 hours (AUROC of 0.868 [0.864-0.872]).  
335 Dziadzko et al. (36) defined the outcome as in-hospital death or respiratory failure,  
336 with a prediction window of 48 hours (AUROC 0.87 [0.85-0.88] and 0.90 [0.84-0.95] in  
337 2013 and 2017, respectively). Malycha et al. (37) defined the outcome as in-hospital  
338 death and ICU transfer within 24 h following assessment from patients admitted  
339 longer than 24 hours (AUROC 0.823 [0.819-0.824]). Cho et al. (10) instead defined the  
340 outcome as cardiac arrest and unexpected ICU admission, occurring within 0.5-25  
341 hours from the assessment (AUROC 0.865 [CI not reported]). The performance  
342 difference of models A-E (Figure3) is driven by information learnt from different data  
343 types. The performance does not increase linearly with the addition of new data types,  
344 suggesting substantial overlap in the latent information of diagnosis codes,

345 biochemical data and clinical notes. This corresponds well to what one would expect,  
346 e.g. a clinical note may very well cite lab values (and likely those of greatest clinical  
347 interest) and summarize anamnestic information such as comorbidities also registered  
348 in the diagnosis code data.

349 On the other hand, the change in performance from model E to model F (AUPRC from  
350 0.131 [0.127-0.137] to 0.287 [0.284-0.289]) is likely driven by the different incidence of  
351 the outcome when using longer prediction windows, essentially making the prediction  
352 task easier because there are more examples to learn from. Also, it is much more  
353 difficult to discriminate between patients having a severe outcome in the subsequent  
354 24 or 48 hours, because drivers of short-term mortality/ICU transfer depend not only  
355 on the physiological status of the patient but also on many factors beyond what is  
356 captured in clinical data, e.g. the coordination of the resources within and between  
357 hospital departments. The assessment rates employed are consistent with how often  
358 new observations and information are recorded in patient files: new clinical notes and  
359 biochemical measurements are usually recorded a couple of times every day and  
360 normally at least once. The change in AUPRC and AUROC during the admissions  
361 reflects the increasing availability of new records when the patients proceed further  
362 into the hospitalization (FigureS6-S7), and that patients tend to deteriorate either early  
363 or late in the admission and less in between.

364 We decided to keep the outcome definition broad rather than predicting specific severe  
365 conditions such as sepsis or organ failure, notoriously difficult to operationalize for  
366 prediction tasks (38). In contrast, using a general definition of clinical deterioration  
367 allowed us to keep the feature space more generic and less dependent on specific  
368 illnesses. Indeed, our model seeks not to advice on interventions but to flag patients at  
369 risk of (more or less imminent) clinical deterioration so health care staff can intervene  
370 in a manner appropriate for the patient in question, hopefully translating into  
371 improved prognosis for that patient.

372 An ensemble structure of the network was preferred over a structure in which the  
373 different data types contributed to the creation of the same embedding space. Separate  
374 submodels (embedding + recurrent linear layer + pooling) allowed us to tune their  
375 architectures; optimal padding sizes and embedding coefficients, for example, differ  
376 for diagnosis codes and biochemical data. Its ensemble nature also renders the model  
377 scalable for incorporating new data types/domains.

378 To obtain a reasonably well-defined training cohort, we only included in-patient  
379 admissions to general departments, excluding out-patients and acute admissions to the  
380 emergency department. The former groups were excluded because they are more  
381 unlikely to experience the outcome, the latter because the rapid course of events and

382 acute physiology recorded in the emergency department would necessitate a different  
383 experimental setup.

## 384 Interpretation

385 Although ranking the features that drive the predicted risks up or down is useful as a  
386 sanity check of the signals picked up by the model, these estimates are not causal.  
387 Indeed, the attribution of each token is determined by its context therefore the same  
388 token could be associated with both elevated and diminished risk depending on the  
389 other tokens with which it co-occurs. For example, a lab value outside the  
390 physiological range (e.g., low creatinine), which would normally drive the risk up, may  
391 not affect the predicted risk when co-occurring diagnosis codes counter its contribution  
392 (e.g., pregnancy codes).

393 This is more evident for the free text, where the semantics of a word is always  
394 dependent on its context. Overall, the feature attribution does not contain any  
395 counterintuitive explanation and the few seemingly questionable interpretations have  
396 plausible explanations. For example, we find low eosinophil counts among the lab  
397 values associated with elevated risk of clinical deterioration. Clinically, this seems  
398 counterintuitive since low values of eosinophils represent the standard and high  
399 eosinophil counts are indicative of infections (especially parasitic) and allergic  
400 disorders. Eosinophils, however, are part of standard panels for blood differential  
401 counts (a count for the different types of white blood cells) and, as such, the very  
402 presence of (any) eosinophil count probably reflects a clinical suspicion of infection  
403 which caused additional analysis to investigate on the infectious agent. Interpretation  
404 of tokens from the clinical notes also provides some examples that at first seem odd but  
405 probably do have some contextual bearing. For example, the tokens *wife* (*hustru*) and  
406 *relatives* (*pårørende*) are strongly associated with clinical deterioration. This is likely  
407 because doctors document in the patient file when relatives have been informed or  
408 consulted, and this may well be on poor prognoses or even no-resuscitation orders in  
409 which case clinical deterioration is almost certain to ensue.

410 Numerical features like the number of previous admissions should also be  
411 contextualized. While higher age is indeed associated with clinical deterioration,  
412 having a lot of admissions prior to the one of the assessments does not. This seeming  
413 paradoxical result can be probably explained by the ability of the model to integrate  
414 data from different EHR domains to recognize patients with chronic conditions who  
415 will have more frequent hospital visits but perhaps be less likely to suddenly fall  
416 critically ill.

## 417 Strengths



418 This study has some important strengths. First, it is one of the largest of its kind, with a  
419 total of 852,620 patients and 2,241,849 admissions taking place over 6 years. Second, we  
420 provided a dynamic risk assessment, showing how prediction performance changes  
421 over the course of an admission for different prediction windows. This supersedes  
422 early warning scores, based on static metrics that do not take sequential information  
423 into account but use just a snapshot of the patient's current status. Third, thanks to the  
424 model's architecture, adding new data sources is relatively easy. New features can be  
425 added and removed from the model, adapting the tool to the available resources.  
426 However, as expected, the model performs best with as many data as possible  
427 included. Finally, while classic EWS depend on complete data to be calculated, missing  
428 data in this setup is not a problem since the model has been designed to handle it  
429 thanks to the entity embeddings.

## 430 Limitations

431 Like any study this has limitations. First, although we tried to define the outcome  
432 robustly, there are some pitfalls to consider for ICU transfer and in-hospital mortality.  
433 Patients in very severe conditions may still be discharged by the hospital if the latter is  
434 not able to provide any support to the patient. These patients will probably experience  
435 clinical deterioration within the prediction window but not within their hospital stay,  
436 hence they are labelled as negative but potentially still flagged by the model as high-  
437 risk patients; this could inflate the number of false positive patients detected by the  
438 model. Second, unplanned ICU transfer was captured only for the patients who were  
439 admitted in one of the ICUs in our catchment area. It cannot be excluded that some  
440 patients admitted to a general department of one of the hospitals in our catchment area  
441 are transferred to ICUs of other Danish regions than included here, even if it is  
442 uncommon. Third, model performance may improve with additional data such as  
443 genetic data, vital signs and other biomarkers. Thanks to ensemble nature, adding such  
444 data in setting where they are available is simple. Finally, the model was trained on  
445 data from the Danish healthcare system and the model (due to the entity embeddings)  
446 would need to be trained anew if deployed in other geographical or healthcare  
447 systems.

## 448 Conclusion

449 Combining entity embeddings and recurrent neural networks we built a highly  
450 performant model for flagging patients at risk of clinical deterioration. The model was  
451 developed and evaluated in a controlled in-silicon setting. Although the data used  
452 were collected prospectively, a proper prospective evaluation would be needed to  
453 establish whether its deployment can produce real-world benefits to patients on hard  
454 endpoints.

## 455   References

- 456   1.    Smith MEB, Chiovaro JC, O'Neil M, Kansagara D, Quiñones AR, Freeman M, et  
457       al. Early warning system scores for clinical deterioration in hospitalized patients:  
458       A systematic review. Vol. 11, *Annals of the American Thoracic Society*.  
459       American Thoracic Society; 2014. p. 1454–65.
- 460   2.    Subbe CP, Kruger M, Rutherford P, Gemmel L. Validation of a modified Early  
461       Warning Score in medical admissions. *QJM: An International Journal of*  
462       *Medicine*. 2001 Oct 1;94(10):521–6.
- 463   3.    Prytherch DR, Smith GB, Schmidt PE, Featherstone PI. ViEWS—Towards a  
464       national early warning score for detecting adult inpatient deterioration.  
465       *Resuscitation*. 2010 Aug 1;81(8):932–7.
- 466   4.    Jones M. NEWSDIG: The National Early Warning Score Development and  
467       Implementation Group. *Clinical Medicine*. 2012 Dec 1;12(6):501.
- 468   5.    Churpek MM, Yuen TC, Edelson DP. Predicting clinical deterioration in the  
469       hospital: The impact of outcome selection. *Resuscitation*. 2013 May 1;84(5):564–8.
- 470   6.    Downey CL, Tahir W, Randell R, Brown JM, Jayne DG. Strengths and limitations  
471       of early warning scores: A systematic review and narrative synthesis. Vol. 76,  
472       *International Journal of Nursing Studies*. Elsevier Ltd; 2017. p. 106–19.
- 473   7.    Pedersen NE, Larsen J, Rasmussen S, Johnsen SP, Petersen A, Thomasen L, et al. A critical  
474       assessment of early warning score records in 168,000 patients. *J Clin Monit*  
475       *Comput*. 2018;32:109–16.
- 476   8.    Al-Shwaheen TI, Moghbel M, Hau YW, Ooi CY. Use of learning approaches to  
477       predict clinical deterioration in patients based on various variables: a review of  
478       the literature. *Artificial Intelligence Review* 2021. 2021 Mar 13;1–30.
- 479   9.    Shamout FE, Zhu T, Sharma P, Watkinson PJ, Clifton DA. Deep Interpretable  
480       Early Warning System for the Detection of Clinical Deterioration. *IEEE J Biomed*  
481       *Health Inform*. 2020 Feb 1;24(2):437–46.
- 482   10.   Cho KJ, Kwon O, Kwon JM, Lee Y, Park H, Jeon KH, et al. Detecting patient  
483       deterioration using artificial intelligence in a rapid response system. *Crit Care*  
484       *Med*. 2020;E285–9.
- 485   11.   da Silva DB, Schmidt D, da Costa CA, da Rosa Righi R, Eskofier B. DeepSigns: A  
486       predictive model based on Deep Learning for the early detection of patient  
487       health deterioration. *Expert Syst Appl*. 2021 Mar 1;165:113905with.

- 488 12. Tóth V, Meytlis M, Barnaby DP, Bock KR, Oppenheim MI, Al-Abed Y, et al. Let  
489 Sleeping Patients Lie, avoiding unnecessary overnight vitals monitoring using a  
490 clinically based deep-learning model. *npj Digital Medicine* 2020 3:1. 2020 Nov  
491 13;3(1):1–9.
- 492 13. Thorsen-Meyer HC, Nielsen AB, Nielsen AP, Kaas-Hansen BS, Toft P,  
493 Schierbeck J, et al. Dynamic and explainable machine learning prediction of  
494 mortality in patients in the intensive care unit: a retrospective study of high-  
495 frequency data in electronic patient records. *Lancet Digit Health*. 2020 Apr  
496 1;2(4):e179–91.
- 497 14. Rajkomar A, Oren E, Chen K, Dai AM, Hajaj N, Hardt M, et al. Scalable and  
498 accurate deep learning with electronic health records. *npj Digital Medicine* 2018  
499 1:1 [Internet]. 2018 May 8 [cited 2021 Sep 20];1(1):1–10. Available from:  
500 <https://www.nature.com/articles/s41746-018-0029-1>
- 501 15. Tomašev N, Glorot X, Rae JW, Zielinski M, Askham H, Saraiva A, et al. A  
502 clinically applicable approach to continuous prediction of future acute kidney  
503 injury. *Nature* 2019 572:7767. 2019 Jul 31;572(7767):116–9.
- 504 16. Lauritsen SM, Kalør ME, Kongsgaard EL, Lauritsen KM, Jørgensen MJ, Lange J,  
505 et al. Early detection of sepsis utilizing deep learning on electronic health record  
506 event sequences. *Artif Intell Med*. 2020 Apr 1;104:101820.
- 507 17. Lauritsen SM, Kristensen M, Olsen MV, Larsen MS, Lauritsen KM, Jørgensen  
508 MJ, et al. Explainable artificial intelligence model to predict acute critical illness  
509 from electronic health records. *Nature Communications* 2020 11:1. 2020 Jul  
510 31;11(1):1–11.
- 511 18. Collins GS, Reitsma JB, Altman DG, Moons KGM. Transparent reporting of a  
512 multivariable prediction model for individual prognosis or diagnosis (TRIPOD):  
513 The TRIPOD Statement. *BMC Med*. 2015 Jan 6;13(1):1–10.
- 514 19. Guo C, Berkhahn F. Entity Embeddings of Categorical Variables. 2016 Apr 22;  
515 Available from: <https://arxiv.org/abs/1604.06737v1>
- 516 20. Cho K, Van Merriënboer B, Bahdanau D, Bengio Y. On the Properties of Neural  
517 Machine Translation: Encoder-Decoder Approaches.
- 518 21. Gers FA, Schmidhuber J, Cummins F. Learning to forget: Continual prediction  
519 with LSTM. *IEE Conference Publication*. 1999;2(470):850–5.
- 520 22. Lin Z, Feng M, dos Santos CN, Yu M, Xiang B, Zhou B, et al. A Structured Self-  
521 attentive Sentence Embedding. 5th International Conference on Learning

- 522 Representations, ICLR 2017 - Conference Track Proceedings [Internet]. 2017 Mar  
523 9 [cited 2022 Aug 25]; Available from: <https://arxiv.org/abs/1703.03130v1>
- 524 23. Schmidt M, Schmidt SAJ, Sandegaard JL, Ehrenstein V, Pedersen L, Sørensen  
525 HT. The Danish National Patient Registry: a review of content, data quality, and  
526 research potential. *Clin Epidemiol*. 2015 Nov 17;7:449.
- 527 24. Grann A, Erichsen R, Nielsen A, Frøslev T, Thomsen R. Existing data sources for  
528 clinical epidemiology: The clinical laboratory information system (LABKA)  
529 research database at Aarhus University, Denmark. *Clin Epidemiol* [Internet].  
530 2011 Apr [cited 2022 Aug 25];3:133. Available from:  
531 <https://pubmed.ncbi.nlm.nih.gov/21487452/>
- 532 25. Perkins J. *Python Text Processing with NLTK 2.0 Cookbook*. 2010.
- 533 26. Joulin A, Grave E, Bojanowski P, Mikolov T. *Bag of Tricks for Efficient Text*  
534 *Classification*. 2016;
- 535 27. François Chollet. *Deep Learning with Python*. 2017. 384 p.
- 536 28. Akiba T, Sano S, Yanase T, Ohta T, Koyama M. Optuna: A Next-generation  
537 Hyperparameter Optimization Framework. In: *Proceedings of the ACM*  
538 *SIGKDD International Conference on Knowledge Discovery and Data Mining*.  
539 New York, NY, USA: Association for Computing Machinery; 2019. p. 2623–31.
- 540 29. Falkner S, Klein A, Hutter F. BOHB: Robust and Efficient Hyperparameter  
541 Optimization at Scale. 2018;
- 542 30. Pinker E. Reporting accuracy of rare event classifiers. *NPJ Digit Med*. 2018  
543 Dec;1(1).
- 544 31. Tomašev N, Harris N, Baur S, Mottram A, Glorot X, Rae JW, et al. Use of deep  
545 learning to develop continuous-risk models for adverse event prediction from  
546 electronic health records. *Nat Protoc*. 2021 May 5;1–23.
- 547 32. Niculescu-Mizil A, Caruana R. *Predicting Good Probabilities With Supervised*  
548 *Learning*. 2005;
- 549 33. Lundberg SM, Lee SI. A Unified Approach to Interpreting Model Predictions.  
550 *Adv Neural Inf Process Syst* [Internet]. 2017 May 22 [cited 2022 Aug 25];2017-  
551 December:4766–75. Available from: <https://arxiv.org/abs/1705.07874v2>
- 552 34. Kokhlikyan N, Miglani V, Martin M, Wang E, Alsallakh B, Reynolds J, et al.  
553 *Captum: A unified and generic model interpretability library for PyTorch*. 2020  
554 Sep 16;

- 555 35. Watkinson PJ, Pimentel MAF, Clifton DA, Tarassenko L. Manual centile-based  
556 early warning scores derived from statistical distributions of observational vital-  
557 sign data. *Resuscitation*. 2018 Aug 1;129:55–60.
- 558 36. Dziadzko MA, Novotny PJ, Sloan J, Gajic O, Herasevich V, Mirhaji P, et al.  
559 Multicenter derivation and validation of an early warning score for acute  
560 respiratory failure or death in the hospital. *Crit Care*. 2018 Oct 30;22(1):1–12.
- 561 37. Malycha J, Farajidavar N, Pimentel MAF, Redfern O, Clifton DA, Tarassenko L,  
562 et al. The effect of fractional inspired oxygen concentration on early warning  
563 score performance: A database analysis. *Resuscitation*. 2019 Jun 1;139:192–9.
- 564 38. Joynes E. More challenges around sepsis: definitions and diagnosis. *J Thorac Dis*.  
565 2016;8(11):E1467.
- 566
- 567
- 568
- 569
- 570
- 571
- 572
- 573
- 574
- 575

576 **Data and software statement**

577 The software used in the study is based on python v3.8 and pytorch. The software is  
578 available online at <https://gitfront.io/r/daplaci/uA6jdq4FtTJQ/ClinicalDeterioration/>.  
579 The authors do not have permission to share data; access to the original data can be  
580 obtained from the Danish health authorities.

581 **Funding and permission statement**

582 This study was approved by the Danish Patient Safety Authority (3-3013-1731 and 3-  
583 3013-1723), the Danish Data Protection Agency (DT SUND 2016-48, 2016-50, 2017-57  
584 and UCPH 514-0255/18-3000:) and the Danish Health Data Authority (FSEID 00003092,  
585 FSEID 00003724, FSEID 00004758 and FSEID 00005191). The Novo Nordisk Foundation  
586 (grants NNF17OC0027594 and NNF14CC0001) and the Danish Innovation Found  
587 (5184-00102B) supported this study.
